# Supplementary material for: Soft template-assisted synthesis of single crystalline β-cobalt hydroxide with distinct morphologies
Source: Royal Society of Chemistry journal article supplement (doi:10.1039/c4ce00164h), 2014-05-13
Supplement: c4ce00164h1.pdf [file c4ce00164h1.pdf]

## Supplementary Information

### Soft template-assisted synthesis of single crystalline $\beta$ -cobalt hydroxide with distinct morphologies

Chen Li, Xiong Zhang, Peng Yu, Haitao Zhang, Xianzhong Sun, Yanwei Ma\*

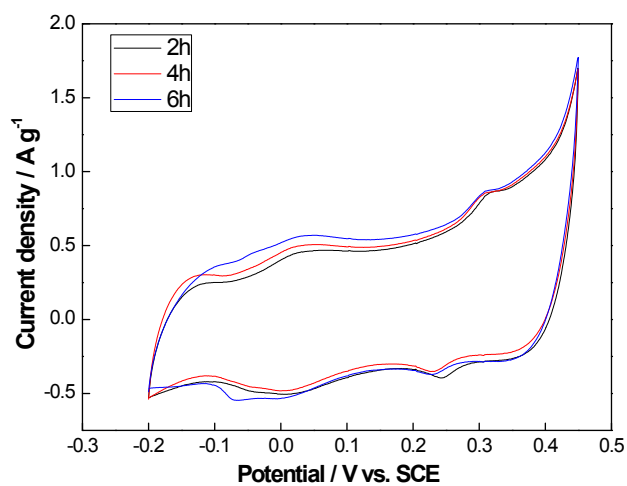

Fig. S1 CV curves of S-PVP under reaction time of 2 h, 4 h, and 6 h

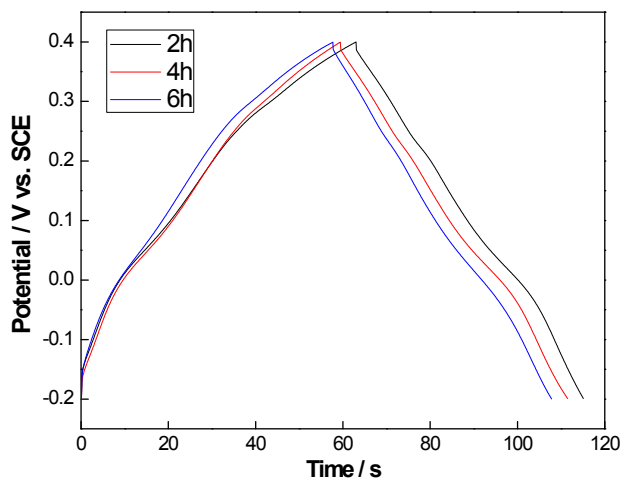

Fig. S2 GCD curves of S-PVP under reaction time of 2 h, 4 h, and 6 h
